# Supplementary material for: Bioactive PEEK: Surface Enrichment of Vitronectin-Derived Adhesive Peptides
Source: MDPI journal article supplement (doi:10.3390/biom13020246), 2023-01-28
Supplement: s1 [file s1]

Supplementary Materials

Article

# Bioactive PEEK: Surface Enrichment of Vitronectin-Derived Adhesive Peptides

Leonardo Cassari <sup>1</sup>, Annj Zamuner <sup>2</sup>, Grazia M. L. Messina <sup>3</sup>, Martina Marsotto <sup>4</sup>, Hongyi Chen <sup>5</sup>, Giovanni Gonella <sup>6</sup>, Trevor Coward <sup>6</sup>, Chiara Battocchio <sup>4</sup>, Jie Huang <sup>5</sup>, Giovanna Iucci <sup>4</sup>, Giovanni Marletta <sup>3</sup>, Lucy Di Silvio <sup>6</sup> and Monica Dettin <sup>1,\*</sup>

<sup>1</sup> Department of Industrial Engineering, University of Padova, Via Marzolo 9, 35131 Padova, Italy; leonardo.cassari@phd.unipd.it

<sup>2</sup> Department of Civil, Environmental, and Architectural Engineering, University of Padova, Via Marzolo 9, 35131 Padova, Italy; annj.zamuner@unipd.it

<sup>3</sup> Laboratory for Molecular Surface and Nanotechnology (LAMSUN), Department of Chemical Sciences, University of Catania and CSGI, Viale A. Doria, 6, 95125 Catania, Italy; gml.messina@unict.it (G.M.L.M.); gmarletta@unict.it (G.M.)

<sup>4</sup> Department of Science, Roma Tre University, Via della Vasca Navale 79, 00146 Roma, Italy; martina.marsotto@uniroma3.it (M.M.); chiara.battocchio@uniroma3.it (C.B.); giovanna.iucci@uniroma3.it (G.I.)

<sup>5</sup> Department of Mechanical Engineering, University College London, London WC1E 6BT, UK; hongyi.chen.16@ucl.ac.uk (H.C.); jie.huang@ucl.ac.uk (J.H.)

<sup>6</sup> Faculty of Dentistry, Oral & Craniofacial Sciences, King's College London, London SE1 9RT, UK; giovanni.gonnella@kcl.ac.uk (G.G.); trevor.coward@kcl.ac.uk (T.C.); lucy.di\_silvio@kcl.ac.uk (L.D.S.)

\* Correspondence: monica.dettin@unipd.it; Tel.: +39-049-8275553

**Table S1.** XPS results.

| Sample   | Signal | Assignment            | BE (eV) | FWHM | Internal Atomic ratios (%) | Atomic ratios |
|----------|--------|-----------------------|---------|------|----------------------------|---------------|
| PEEK     | C1s    | C <sub>ar</sub> , C-C | 284.7   | 1.52 | 73                         | 0.61          |
|          |        | C-N, C-O              | 286.3   |      | 23                         | 0.19          |
|          |        | C=O                   | 287.7   |      | 4                          | 0.03          |
|          | O1s    | C=O                   | 531.4   | 1.79 | 51                         | 0.08          |
|          |        | C-O                   | 533.4   |      | 49                         | 0.08          |
| PEEK-HVP | C1s    | C <sub>ar</sub> , C-C | 284.7   | 1.56 | 60                         | 0.41          |
|          |        | C-N                   | 286.0   |      | 25                         | 0.17          |
|          |        | C-O                   | 287.5   |      | 9                          | 0.06          |
|          |        | C=O                   | 288.7   |      | 6                          | 0.04          |

|            |     |                       |       |      |    |       |
|------------|-----|-----------------------|-------|------|----|-------|
|            | N1s | C=N                   | 398.6 | 1.63 | 7  | 0.005 |
|            |     | C-N                   | 399.8 |      | 82 | 0.07  |
|            |     | -N <sup>+</sup>       | 401.2 | .    | 11 | 0.009 |
|            | O1s | C=O                   | 531.6 | 2.15 | 69 | 0.16  |
|            |     | C-O                   | 533.2 |      | 31 | 0.07  |
| PEEK-D2HVP | C1s | C <sub>ar</sub> , C-C | 284.7 | 1.52 | 75 | 0.60  |
|            |     | C-N                   | 286.1 |      | 17 | 0.14  |
|            |     | C-O                   | 287.5 |      | 5  | 0.04  |
|            |     | C=O                   | 288.4 |      | 3  | 0.02  |
|            | N1s | C=N                   | 398.2 | 1.58 | 10 | 0.007 |
|            |     | C-N                   | 399.7 |      | 74 | 0.05  |
|            |     | -N <sup>+</sup>       | 400.7 | .    | 16 | 0.01  |
|            | O1s | C=O                   | 531.4 | 2.11 | 72 | 0.095 |
|            |     | C-O                   | 532.9 |      | 28 | 0.037 |

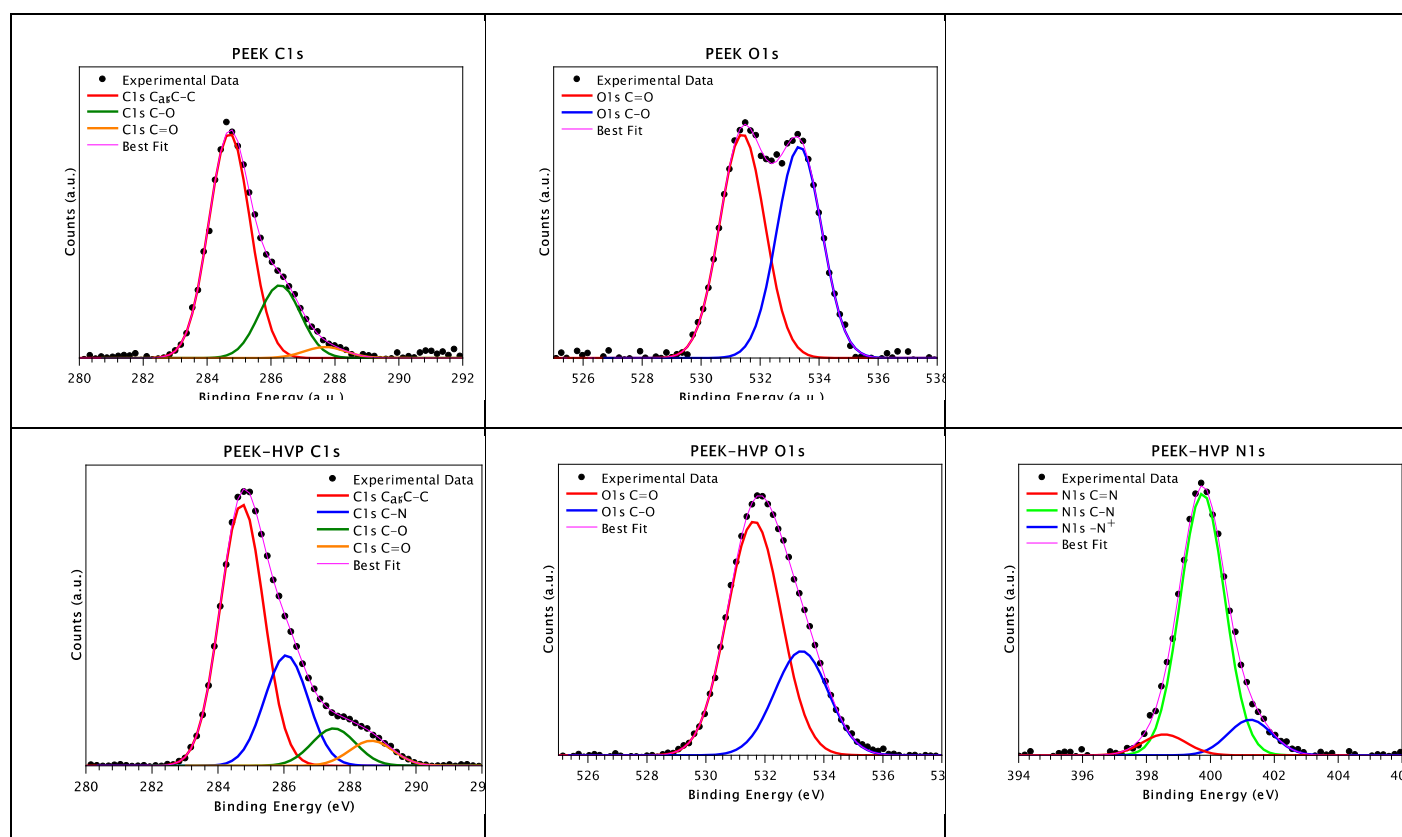

**Figure S1.** XPS spectra and peak fit results of sample PEEK and PEEK-HVP

**Disclaimer/Publisher's Note:** The statements, opinions and data contained in all publications are solely those of the individual author(s) and contributor(s) and not of MDPI and/or the editor(s). MDPI and/or the editor(s) disclaim responsibility for any injury to people or property resulting from any ideas, methods, instructions or products referred to in the content.
